# Supplementary material for: KB(PO4)F: a novel acentric deep-ultraviolet material
Source: Royal Society of Chemistry journal article supplement (doi:10.1039/c6dt04026h), 2017-01-01
Supplement: c6dt04026h2.pdf [file c6dt04026h2.pdf]

## KB(PO<sub>4</sub>)F: A novel acentric deep-ultraviolet material

Ji-Hong Jiang<sup>a</sup>, Lin-Chuan Zhang<sup>a</sup>, Ya-Xi Huang<sup>a</sup>, Zhi-Mei Sun<sup>b</sup>, Yuanming Pan<sup>c</sup>,  
Jin-Xiao Mi<sup>a,\*</sup>

<sup>a</sup> Fujian Provincial Key Laboratory of Advanced Materials, Department of Materials  
Science and Engineering, College of Materials, Xiamen University, Xiamen 361005,  
Fujian Province, People's Republic of China

<sup>b</sup> School of Materials Science and Engineering, Beihang University, Beijing 100191,  
People's Republic of China

<sup>c</sup> Department of Geological Sciences, University of Saskatchewan, 114 Science Place,  
Saskatoon, Canada SK S7N 5E2

\* Corresponding author: jxmi@xmu.edu.cn

Table S1. Atomic displacement parameters (Å<sup>2</sup>) of KB(PO<sub>4</sub>)F

| atoms | $U_{11}$    | $U_{22}$    | $U_{33}$    | $U_{12}$    | $U_{13}$   | $U_{23}$   |
|-------|-------------|-------------|-------------|-------------|------------|------------|
| K1    | 0.0199 (12) | 0.0210 (14) | 0.0097 (11) | 0.0024 (10) | 0.0004 (8) | 0.0000 (9) |
| P1    | 0.0105 (12) | 0.0086 (12) | 0.0095 (15) | -0.0008 (9) | 0.0012 (9) | 0.0006 (9) |
| B1    | 0.008 (6)   | 0.013 (5)   | 0.012 (6)   | -0.003 (5)  | 0.001 (5)  | 0.008 (4)  |
| F1    | 0.020 (4)   | 0.027 (4)   | 0.009 (4)   | 0.003 (3)   | 0.000 (3)  | 0.000 (3)  |
| O1    | 0.018 (4)   | 0.014 (4)   | 0.011 (4)   | 0.005 (3)   | -0.004 (3) | -0.001 (3) |
| O2    | 0.014 (4)   | 0.012 (3)   | 0.010 (4)   | 0.000 (3)   | 0.006 (3)  | -0.004 (3) |
| O3    | 0.012 (4)   | 0.011 (3)   | 0.023 (5)   | -0.003 (3)  | 0.002 (3)  | 0.004 (3)  |
| O4    | 0.019 (4)   | 0.021 (4)   | 0.015 (4)   | -0.005 (3)  | 0.004 (3)  | 0.000 (3)  |

Table S2. Selected bond lengths and angles (Å, °) for KB(PO<sub>4</sub>)F.

|                      |           |                        |            |
|----------------------|-----------|------------------------|------------|
| K1—F1 <sup>i</sup>   | 2.666 (8) | P1—O4                  | 1.474 (9)  |
| K1—O2 <sup>ii</sup>  | 2.772 (9) | P1—O2                  | 1.546 (8)  |
| K1—F1                | 2.785 (7) | P1—O3                  | 1.552 (8)  |
| K1—O4 <sup>iii</sup> | 2.792 (9) | P1—O1                  | 1.566 (9)  |
| K1—O4 <sup>iv</sup>  | 2.802 (9) | B1—F1                  | 1.414 (14) |
| K1—F1 <sup>v</sup>   | 2.884 (8) | B1—O2 <sup>vi</sup>    | 1.447 (15) |
| K1—O4 <sup>ii</sup>  | 2.968 (9) | B1—O1                  | 1.449 (15) |
| K1—O3 <sup>vi</sup>  | 3.027 (9) | B1—O3 <sup>ix</sup>    | 1.458 (14) |
| K1—O1                | 3.060 (9) | B1 <sup>i</sup> —O3—P1 | 129.6 (8)  |
| O4—P1—O2             | 108.8 (5) | F1—B1—O2 <sup>vi</sup> | 110.3 (9)  |
| O4—P1—O3             | 115.6 (5) | F1—B1—O1               | 104.1 (9)  |

|          |           |                                       |            |
|----------|-----------|---------------------------------------|------------|
| O2—P1—O3 | 104.3 (4) | O2 <sup>vi</sup> —B1—O1               | 114.4 (9)  |
| O4—P1—O1 | 115.5 (5) | F1—B1—O3 <sup>ix</sup>                | 109.5 (8)  |
| O2—P1—O1 | 108.6 (5) | O2 <sup>vi</sup> —B1—O3 <sup>ix</sup> | 109.6 (10) |
| O3—P1—O1 | 103.3 (5) | O1—B1—O3 <sup>ix</sup>                | 108.6 (10) |
| B1—O1—P1 | 127.2 (8) | B1 <sup>xi</sup> —O2—P1               | 134.6 (8)  |

Symmetry codes: (i)  $x+1/2, y-1/2, z$ ; (ii)  $x-1, -y+1, z-1/2$ ; (iii)  $x, -y+1, z-1/2$ ; (iv)  $x-1/2, -y+1/2, z-1/2$ ; (v)  $x-1/2, y-1/2, z$ ; (vi)  $x-1, y, z$ ; (vii)  $x+1, -y+1, z+1/2$ ; (viii)  $x+1/2, -y+1/2, z+1/2$ ; (ix)  $x-1/2, y+1/2, z$ ; (x)  $x+1/2, y+1/2, z$ ; (xi)  $x+1, y, z$ ; (xii)  $x, -y+1, z+1/2$ .

Table S3. Bond valence sums (BVS) for KB(PO<sub>4</sub>)F.

|     | K1                | P1    | B1    | BVS   |
|-----|-------------------|-------|-------|-------|
| O1  | 0.081             | 1.109 | 0.810 | 2.00  |
| O2  | 0.176             | 1.171 | 0.815 | 2.162 |
| O3  | 0.088             | 1.152 | 0.790 | 2.030 |
| O4  | 0.167+0.163+0.104 | 1.422 |       | 1.856 |
| F1  | 0.161+0.117+0.089 |       | 0.754 | 1.121 |
| BVS | 1.146             | 4.854 | 3.169 |       |

Table S4. Comparisons of the interlayer bonding in KBe<sub>2</sub>BO<sub>3</sub>F<sub>2</sub> and KB(PO<sub>4</sub>)F

| species             | bonds               | lengths(Å) | q <sub>1</sub> <sup>a</sup> | q <sub>1</sub> <sup>a</sup> | F  <sup>b</sup> |
|---------------------|---------------------|------------|-----------------------------|-----------------------------|-----------------|
| KBBF <sup>c</sup>   | K-F1                | 2.755      | 0.756                       | 0.901                       | 1               |
| KBPO <sub>4</sub> F | K-F1 <sup>i</sup>   | 2.666      | 1.146                       | 1.121                       | 2.01            |
|                     | K-F1                | 2.785      | 1.146                       | 1.121                       | 1.84            |
|                     | K-F1 <sup>v</sup>   | 2.884      | 1.146                       | 1.121                       | 1.72            |
|                     | K-O1                | 3.060      | 1.146                       | 2.000                       | 2.72            |
|                     | K-O2                | 2.772      | 1.146                       | 2.162                       | 3.58            |
|                     | K-O3                | 3.027      | 1.146                       | 2.030                       | 2.82            |
|                     | K-O4 <sup>iii</sup> | 2.792      | 1.146                       | 1.856                       | 3.03            |
|                     | K-O4 <sup>iv</sup>  | 2.802      | 1.146                       | 1.856                       | 3.011           |
|                     | K-O4 <sup>ii</sup>  | 2.968      | 1.146                       | 1.856                       | 2.682           |

<sup>a</sup> In multiples of  $1.602 \times 10^{-19}C$ . <sup>b</sup> In multiples of  $|F_{KBBF}|$ . <sup>c</sup> Data from ref "L. F. Mei, Y. B. Wang, C. T. Chen and B. C. Wu, *J Appl Phys*, 1993, **74**, 7014-7015".

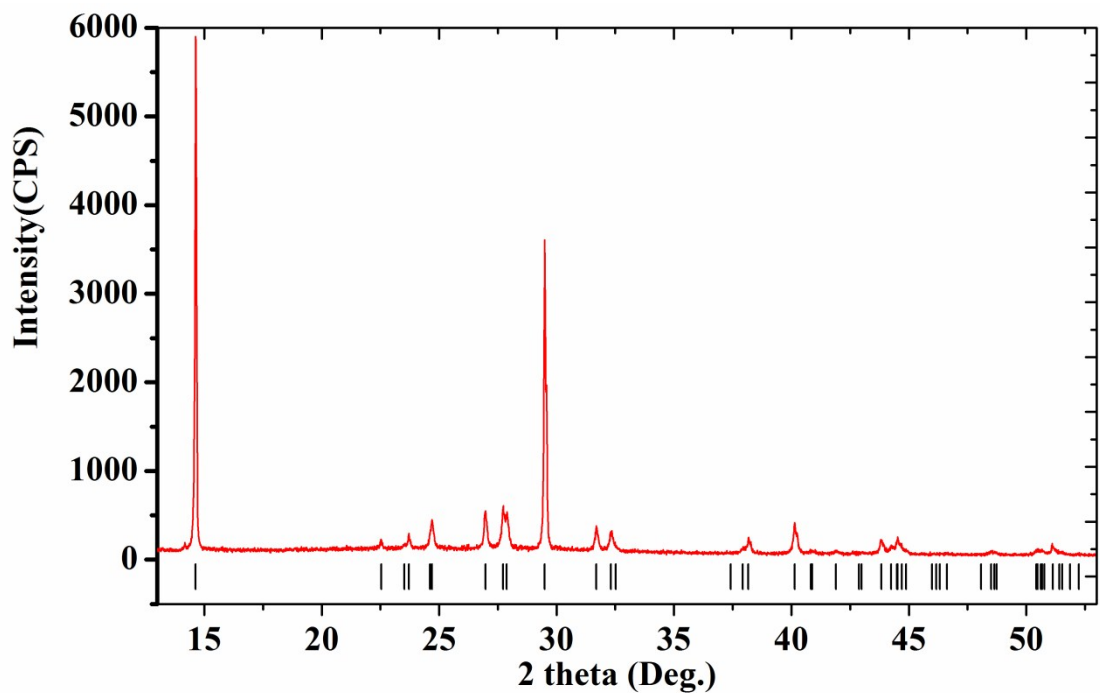

Figure S1 Experimental and calculated PXRD patterns of KB(PO<sub>4</sub>)F.

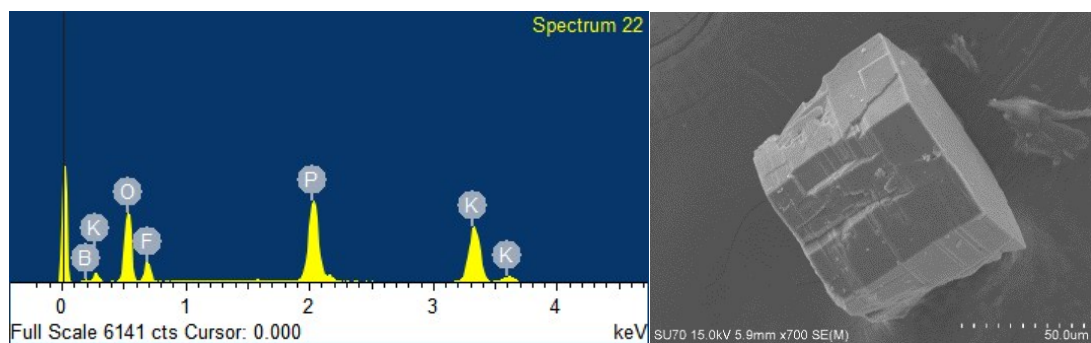

Figure S2 Representative EDX spectrum and SEM image of KB(PO<sub>4</sub>)F.

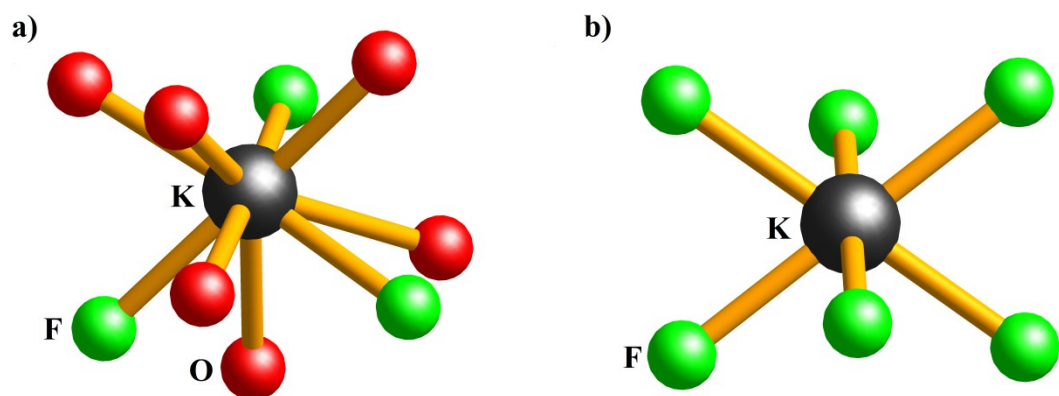

Figure S3 Coordination environments of the K atoms in KBPO<sub>4</sub>F (a) and KBBF (b).

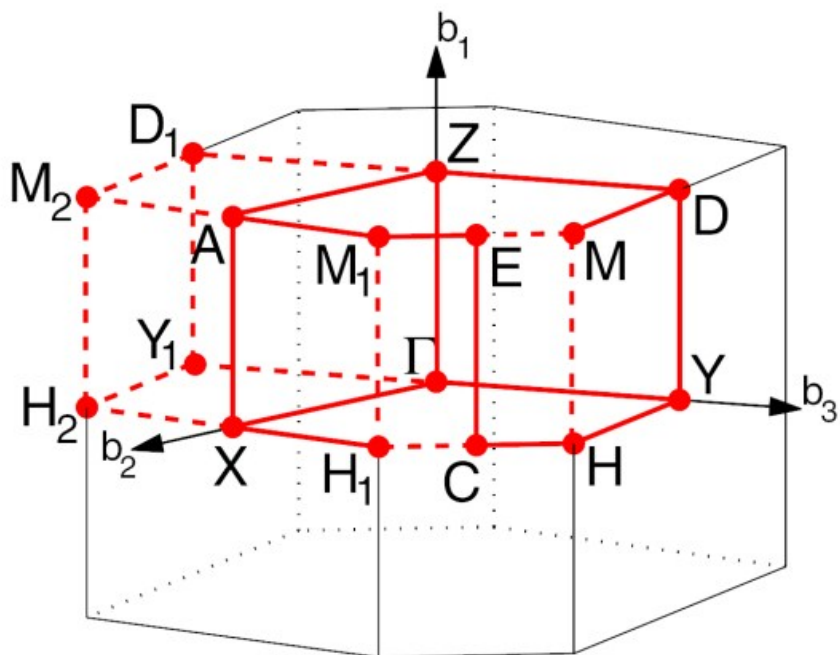

Figure S4 The high symmetry  $k$ -path of a monoclinic lattice for the title compound as generated by AFLOW.

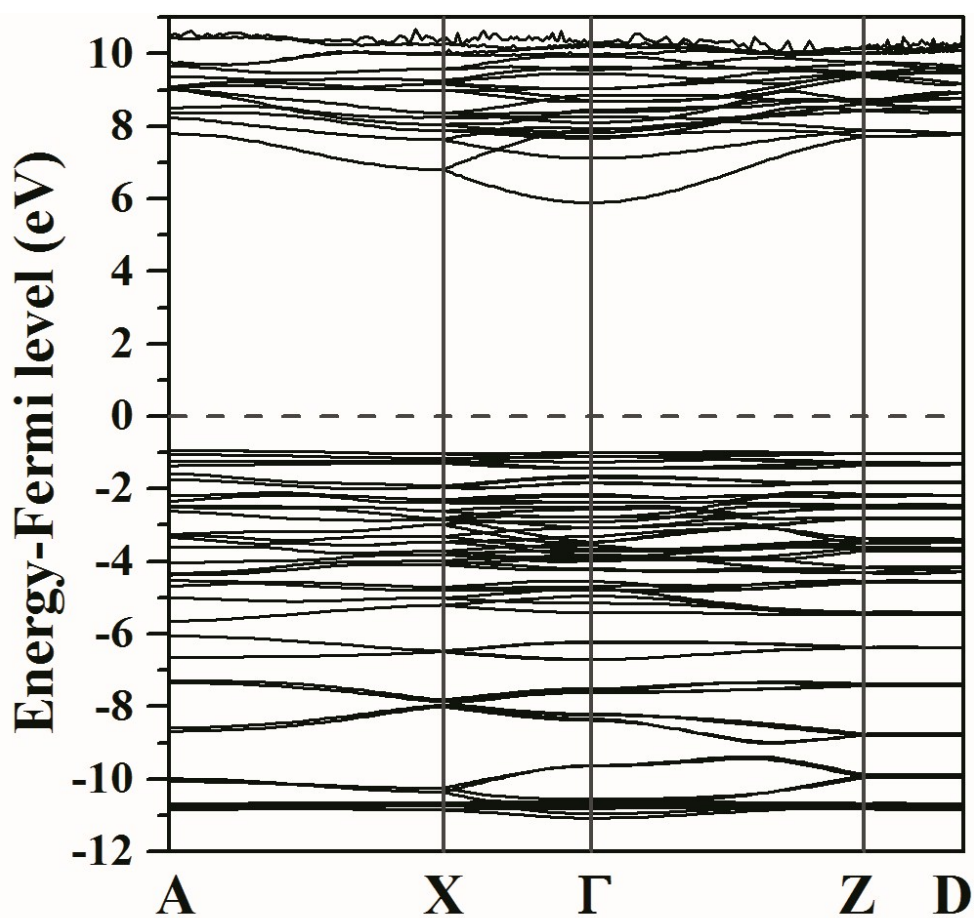

Figure S5. The calculated electronic band structure of  $\text{KB}(\text{PO}_4)\text{F}$ .

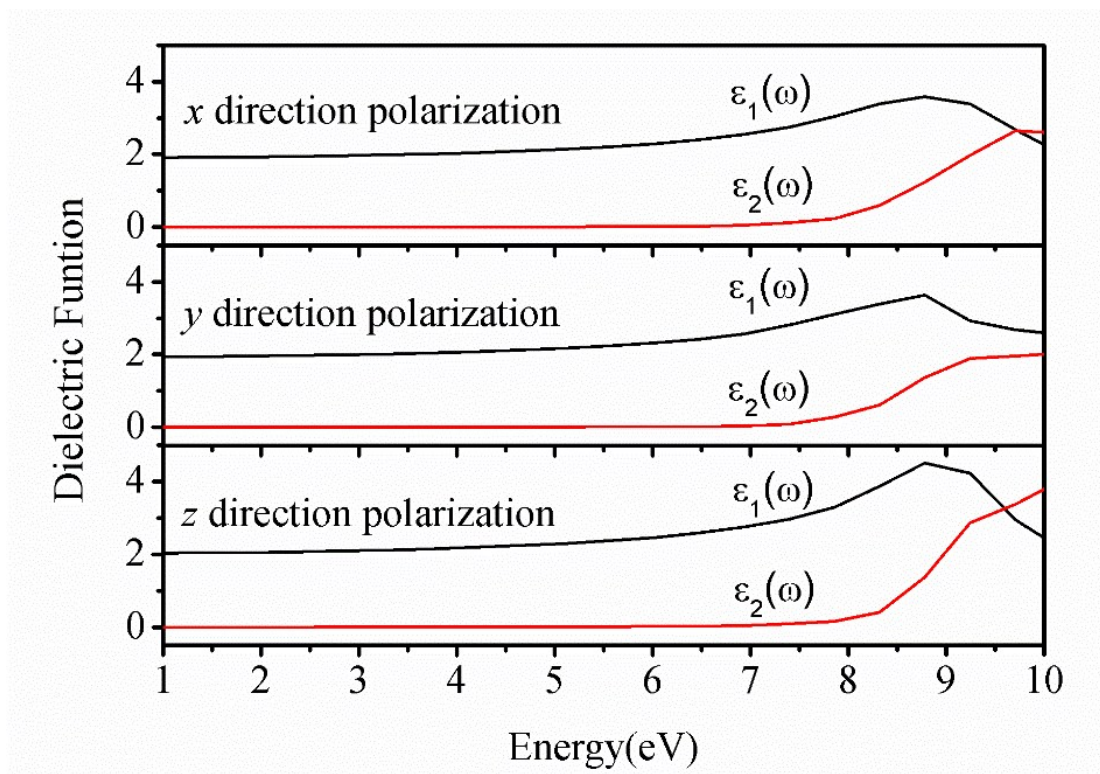

Figure S6 Dielectric function of  $\text{KB}(\text{PO}_4)\text{F}$ .

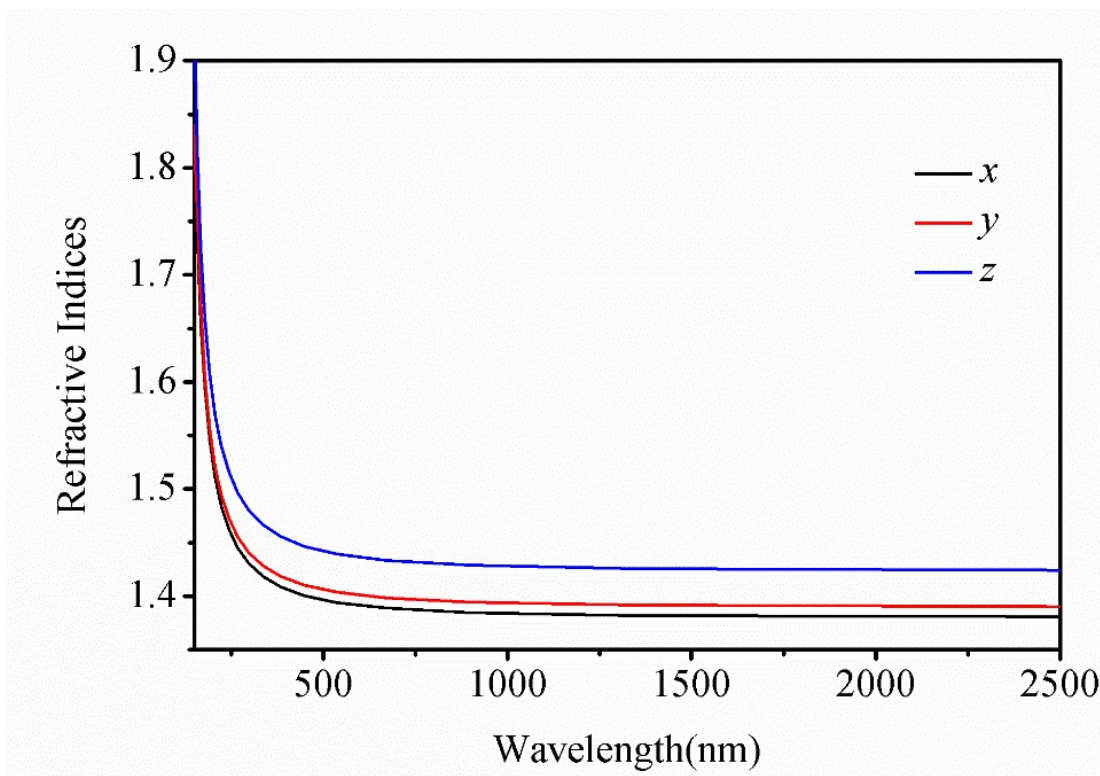

Figure S7 Refractive index curves of  $\text{KB}(\text{PO}_4)\text{F}$
